# Supplementary material for: 3D skeletal muscle fascicle engineering is improved with TGF-β1 treatment of myogenic cells and their co-culture with myofibroblasts
Source: PeerJ. 2018 Jul 11;6:e4939. doi: 10.7717/peerj.4939 (PMC6045923; doi:10.7717/peerj.4939)
Supplement: Supplemental Information 2 — The spreadsheet contains the average circularity values of the nuclei for 2D FibCon and 2D FibTGFB conditions in 13 images, respectively. A value of 1 denotes a perfect circle, and value of 0 denotes a line, or completely noncircular object. [file peerj-06-4939-s002.xlsx]

## Sheet: Fig 2J
Av. Nuceli circularity	2D FibCon	2D FibTGFB
Image 1	0.706	0.787
2	0.682	0.827
3	0.683	0.775
4	0.763	0.749
5	0.666	0.787
6	0.721	0.805
7	0.732	0.784
8	0.631	0.784
9	0.68	0.749
10	0.729	0.771
11	0.771	0.798
12	0.74	0.76
13	0.723	0.795
	2D FibCon	2D FibTGFB
average	0.709769	0.782385
SD	0.0399691	0.0221116
SE	0.0110854	0.00613266
