# Supplementary material for: 3D skeletal muscle fascicle engineering is improved with TGF-β1 treatment of myogenic cells and their co-culture with myofibroblasts
Source: PeerJ. 2018 Jul 11;6:e4939. doi: 10.7717/peerj.4939 (PMC6045923; doi:10.7717/peerj.4939)
Supplement: Supplemental Information 3 — This dataset includes the total nuclei count for 13 images each of 2D FibCon and 2D FibTGFB samples and the calculated average number of nuclei per image. [file peerj-06-4939-s003.xlsx]

## Sheet: Fig 2K
total nuclei	2D FibCon	2D FibTGFB
Image 1	66	194
2	57	136
3	56	190
4	56	163
5	46	183
6	74	100
7	59	184
8	57	134
9	57	120
10	54	131
11	54	145
12	67	149
13	80	187
	2D FibCon	2D FibTGFB
average	60.2308	155.077
SD	9.16655	30.5818
SE	2.54234	8.48185
