# Supplementary material for: 3D skeletal muscle fascicle engineering is improved with TGF-β1 treatment of myogenic cells and their co-culture with myofibroblasts
Source: PeerJ. 2018 Jul 11;6:e4939. doi: 10.7717/peerj.4939 (PMC6045923; doi:10.7717/peerj.4939)
Supplement: Supplemental Information 4 — This spreadsheet contained the angle (θ) formed between the x axis of an image and each myotube within that image. The SD of all θ measurements was calculated and averaged for 8 images each of 2D MyoCon and 2D CoCon conditions to assess the magnitude of alignment of myotubes. [file peerj-06-4939-s004.xlsx]

## Sheet: Fig 2L
Angle θ	2D CoCon-1	2D CoCon-2	2D CoCon-3	2D CoCon-4	2D CoCon-5	2D CoCon-6	2D CoCon-7	2D CoCon-8	2D MyoCon-1	2D MyoCon-2	2D MyoCon-3	2D MyoCon-4	2D MyoCon-5	2D MyoCon-6	2D MyoCon-7	2D MyoCon-8
Image 1	100.028	167.89	52.184	10.641	73.686	93.077	56.434	83.565	46.637	31.701	80.91	113.356	68.475	47.021	108.741	156.949
2	102.239	160.852	75.875	15.046	64.799	99.13	49.475	88.843	33.996	117.897	63.229	154.259	72.031	90	157.366	55.138
3	97.872	139.214	101.459	43.668	62.969	96.968	49.6	50.889	136.521	28.359	56.31	170.665	103.627	140.194	62.84	57.475
4	125.35	140.711	116.301	23.429	56.31	112.119	49.399	76.961	139.304	22.533	108.712	49.497	36.87	140.856	13.548	55.364
5	125.518	133.409	117.135	15.362	52.765	93.907	34.019	75.165	121.551	11.944	38.541	140.763	94.808	35.263	9.831	61.425
6	82.85	139.086	104.72	24.605	61.343	90.644	53.569	70.769	131.76	9.211	1.005	124.919	141.691	173.224	52.975	68.199
7	116.1	130.601	103.431	28.443	53.637	92.579	34.611	31.535	65.956	20.807	63.435	61.336	82.983	45	74.624	42.374
8	78.232	146.793	110.556	38.157	57.653	97.042	33.959	82.086	73.909	140.755	33.366	40.292	166.201	12.465	100.049	45.785
9	89.593	148.671	107.063	18.677	49.145	100.091	43.986	77.949	147.458	170.538	116.565	129.401	140.013	162.101	124.695	60.852
10		151.876	105.038	19.29	54.118	97.524	37.569	75.411	30.033	145.421	62.65	153.06	22.443	129.883	99.015	24.444
11		146.182	115.741	42.797	53.484	92.42	39.699	74.407	120.964	159.444	32.525	34.574	16.914	150.489	147.995	71.966
12		144.699	100.408	45.556	48.715	98.219	41.055	89.472	106.46	147.216	120.579	54.09	164.148	133.452	114.341	19.179
13		128.797	114.281	55.008	50.906	105.362	37.349	93.366	132.184	13.87	105.186	140.281	7.8	135.431	39.92	27.854
14		136.668	111.01	52.907	79.661	73.361	45.855	87.524	138.215	169.216	53.13	66.714	94.086	159.656	35.538	35.166
15		136.138	102.958	27.688	79.16	66.541	44.132	104.886	161.792	143.791	148.671	129.118	92.816	7.929	37.185	28.909
16		140.194	111.58	51.911	67.218	108.988	41.583	104.036	118.131	151.189	123.69	106.858	36.714	156.854	122.905	77.935
17		143.746	72.943	51.953	25.084				28.787	169.603	167.719	45	52.224	163.361	128.83	82.084
18		135.707		45.444	23.429				42.614	166.799	144.728	78.366	29.604	152.071	27.81	95.332
19		152.008		36.469					144.728	30.379	145.214	14.72	110.891	24.864	54.103	135.682
20		142.918		98.696						119.624	94.185	113.459	15.762	152.162	73.899	144.638
21		162.541		108.925						92.045	29.982	43.919		148.339	67.62	93.621
22		157.801		151.844						112.964	24.567	49.304		118.237	132.221	80.036
23		161.162		134.004						152.7	91.193	55.739			163.926	68.508
24		159.444		133.332						66.371	25.796	111.801			101.634	163.072
25				137.816						48.652	23.499	52.431			73.413
26				139.514						39.094	132.23	157.543			104.191
27										50.856		52.125			49.447
28										8.236					128.108
29										1.081					167.8
30															156.038
average	101.976	146.129	101.334	59.6608	56.3379	94.8733	43.2684	79.179	101.105	87.6654	80.293	90.5033	77.505	112.675	91.0203	72.9995
SD	17.3338	10.9445	17.7981	45.7032	15.0661	11.4837	7.01784	18.2157	45.9526	62.9142	47.5352	46.3655	50.1425	55.891	46.5934	41.0965
	2D MyoCon	2D CoCon
average SD	49.5614	17.9454
SD	6.82962	11.889
SE	2.41463	4.20338
