# Supplementary material for: 3D skeletal muscle fascicle engineering is improved with TGF-β1 treatment of myogenic cells and their co-culture with myofibroblasts
Source: PeerJ. 2018 Jul 11;6:e4939. doi: 10.7717/peerj.4939 (PMC6045923; doi:10.7717/peerj.4939)
Supplement: Supplemental Information 5 — This dataset contains calculated fold changes in gene expression for three genes: human collagen 1, human alpha-smooth muscle actin, and mouse myogenin. The ΔΔCT method was employed to calculate fold changes from critical threshold (CT) values, and normalized to GAPDH housekeeping genes in each species. [file peerj-06-4939-s005.xlsx]

## Sheet: Fig 3A-C
CT	hGAPDH	hCOL1	hSMA		ΔCT	hCOL1	hSMA		Av. ΔCT	hCOL1	hSMA		Fold Change	hCOL1	hSMA		Av. Fold Change	hCOL1	hSMA
2D FibCon-1	28.3367	19.2633	23.8467		2D FibCon-1	-9.07333	-4.49		2D FibCon	-9.07733	-4.21133		2D FibCon-1	0.997231	1.21307		2D FibCon	1.02943	1.07134
2D FibCon-2	28.8167	19.95	24.1467		2D FibCon-2	-8.86667	-4.67						2D FibCon-2	0.864138	1.37427		2D FibTGFB	1.92379	14.9454
2D FibCon-3	28.3533	19.5167	24.1367		2D FibCon-3	-8.83667	-4.21667		ΔΔCT	hCOL1	hSMA		2D FibCon-3	0.846354	1.0037		2D CoCon	0.424118	2.77697
2D FibCon-4	27.97	18.25	24.89		2D FibCon-4	-9.72	-3.08		2D FibCon-1	0.004	-0.278667		2D FibCon-4	1.56121	0.456494		2D CoTGFB	1.41479	6.92281
2D FibCon-5	28.22	19.33	23.62		2D FibCon-5	-8.89	-4.6		2D FibCon-2	0.210667	-0.458667		2D FibCon-5	0.878228	1.30918		3D FibCon	0.00219347	0.000769726
2D FibTGFB-1	26.3767	16.8467	18.8033		2D FibTGFB-1	-9.53	-7.57333		2D FibCon-3	0.240667	-0.00533333		2D FibTGFB-1	1.36857	10.2817		3D FibTGFB	0.00785129	0.000864445
2D FibTGFB-2	26.2033	16.9033	17.99		2D FibTGFB-2	-9.3	-8.21333		2D FibCon-4	-0.642667	1.13133		2D FibTGFB-2	1.16689	16.0222		3D CoCon	0.769767	0.300538
2D FibTGFB-3	26.16	15.79	18.05		2D FibTGFB-3	-10.37	-8.11		2D FibCon-5	0.187333	-0.388667		2D FibTGFB-3	2.4498	14.9147		3D CoTGFB	8.29835	0.21058
2D FibTGFB-4	26.76	15.76	18.34		2D FibTGFB-4	-11	-8.42		2D FibTGFB-1	-0.452667	-3.362		2D FibTGFB-4	3.79123	18.4899
2D FibTGFB-5	25.31	16.48	17.19		2D FibTGFB-5	-8.83	-8.12		2D FibTGFB-2	-0.222667	-4.002		2D FibTGFB-5	0.842452	15.0185		SD	hCOL1	hSMA
2D CoCon-1	32.4567	24.0033	27.1867		2D CoCon-1	-8.45333	-5.27		2D FibTGFB-3	-1.29267	-3.89867		2D CoCon-1	0.648869	2.08301		2D FibCon	0.303121	0.371159
2D CoCon-2	33.9867	25.7533	28.1133		2D CoCon-2	-8.23333	-5.87333		2D FibTGFB-4	-1.92267	-4.20867		2D CoCon-2	0.557097	3.16455		2D FibTGFB	1.20566	2.97825
2D CoCon-3	32.7167	26.5533	27.9133		2D CoCon-3	-6.16333	-4.80333		2D FibTGFB-5	0.247333	-3.90867		2D CoCon-3	0.132678	1.50733		2D CoCon	0.201648	1.00209
2D CoCon-4	32.48	25	26.66		2D CoCon-4	-7.48	-5.82		2D CoCon-1	0.624	-1.05867		2D CoCon-4	0.330487	3.0497		2D CoTGFB	0.88418	2.16377
2D CoCon-5	33.69	25.76	27.45		2D CoCon-5	-7.93	-6.24		2D CoCon-2	0.844	-1.662		2D CoCon-5	0.451459	4.08028		3D FibCon	0.000759983	0.000555367
2D CoTGFB-1	33.84	23.5033	26.58		2D CoTGFB-1	-10.3367	-7.26		2D CoCon-3	2.914	-0.592		2D CoTGFB-1	2.39385	8.27447		3D FibTGFB	0.00483639	0.000628061
2D CoTGFB-2	31.28	22.4933	24.8567		2D CoTGFB-2	-8.78667	-6.42333		2D CoCon-4	1.59733	-1.60867		2D CoTGFB-2	0.817524	4.63317		3D CoCon	0.643195	0.218556
2D CoTGFB-3	30.5967	20.32	24.1633		2D CoTGFB-3	-10.2767	-6.43333		2D CoCon-5	1.14733	-2.02867		2D CoTGFB-3	2.29634	4.6654		3D CoTGFB	5.69551	0.0540129
2D CoTGFB-4	30.78	22.89	23.34		2D CoTGFB-4	-7.89	-7.44		2D CoTGFB-1	-1.25933	-3.04867		2D CoTGFB-4	0.439114	9.37401
2D CoTGFB-5	30.91	21.66	23.76		2D CoTGFB-5	-9.25	-7.15		2D CoTGFB-2	0.290667	-2.212		2D CoTGFB-5	1.12714	7.66702		SE	hCOL1	hSMA
3D FibCon-1	30.92	30.9467	35.88		3D FibCon-1	0.0266667	4.96		2D CoTGFB-3	-1.19933	-2.222		3D FibCon-1	0.00181728	0.00173442		2D FibCon	0.13556	0.165987
3D FibCon-2	29.13	29.17	35.81		3D FibCon-2	0.04	6.68		2D CoTGFB-4	1.18733	-3.22867		3D FibCon-2	0.00180057	0.00052648		2D FibTGFB	0.539189	1.33191
3D FibCon-3	28.19	27.27	35.0833		3D FibCon-3	-0.92	6.89333		2D CoTGFB-5	-0.172667	-2.93867		3D FibCon-3	0.00350266	0.000454111		2D CoCon	0.0901799	0.44815
3D FibCon-4	28.63	28.8	35.74		3D FibCon-4	0.17	7.11		3D FibCon-1	9.104	9.17133		3D FibCon-4	0.00164541	0.000390786		2D CoTGFB	0.395417	0.967667
3D FibCon-5	28.0233	27.7733	34.2067		3D FibCon-5	-0.25	6.18333		3D FibCon-2	9.11733	10.8913		3D FibCon-5	0.00220145	0.000742837		3D FibCon	0.000339875	0.000248368
3D FibTGFB-1	29.5167	26.5667	34.97		3D FibTGFB-1	-2.95	5.45333		3D FibCon-3	8.15733	11.1047		3D FibTGFB-1	0.014305	0.0012321		3D FibTGFB	0.0021629	0.000280878
3D FibTGFB-2	31.05	28.7967	35.97		3D FibTGFB-2	-2.25333	4.92		3D FibCon-4	9.24733	11.3213		3D FibTGFB-2	0.00882615	0.00178318		3D CoCon	0.287646	0.0977413
3D FibTGFB-3	28.7433	26.3433	35.2267		3D FibTGFB-3	-2.4	6.48333		3D FibCon-5	8.82733	10.3947		3D FibTGFB-3	0.00977063	0.000603371		3D CoTGFB	2.54711	0.0241553
3D FibTGFB-4	28.2767	28.2867	35.35		3D FibTGFB-4	0.01	7.07333		3D FibTGFB-1	6.12733	9.66467		3D FibTGFB-4	0.0018384	0.000400845
3D FibTGFB-5	27.9167	26.63	35.395		3D FibTGFB-5	-1.28667	7.47833		3D FibTGFB-2	6.824	9.13133		3D FibTGFB-5	0.00451623	0.000302733
3D CoCon-1	32.7633	23.1667	29.53		3D CoCon-1	-9.59667	-3.23333		3D FibTGFB-3	6.67733	10.6947		3D CoCon-1	1.43329	0.507683
3D CoCon-2	31.8133	22.1567	28.78		3D CoCon-2	-9.65667	-3.03333		3D FibTGFB-4	9.08733	11.2847		3D CoCon-2	1.49416	0.441964
3D CoCon-3	32.4067	24.3933	29.4267		3D CoCon-3	-8.01333	-2.98		3D FibTGFB-5	7.79067	11.6897		3D CoCon-3	0.478304	0.425924
3D CoCon-4	31.26	24.67	31.21		3D CoCon-4	-6.59	-0.05		3D CoCon-1	-0.519333	0.978		3D CoCon-4	0.178336	0.0558874
3D CoCon-5	31.55	24.39	31.15		3D CoCon-5	-7.16	-0.4		3D CoCon-2	-0.579333	1.178		3D CoCon-5	0.264743	0.0712319
3D CoTGFB-1	35.92	22.98	33.7033		3D CoTGFB-1	-12.94	-2.21667		3D CoCon-3	1.064	1.23133		3D CoTGFB-1	14.5472	0.250926
3D CoTGFB-2	34.67	22.03	32.67		3D CoTGFB-2	-12.64	-2		3D CoCon-4	2.48733	4.16133		3D CoTGFB-2	11.816	0.215935
3D CoTGFB-3	36.565	24.08	34.745		3D CoTGFB-3	-12.485	-1.82		3D CoCon-5	1.91733	3.81133		3D CoTGFB-3	10.6123	0.190606
3D CoTGFB-4	30.6933	20.49	29.43		3D CoTGFB-4	-10.2033	-1.26333		3D CoTGFB-1	-3.86267	1.99467		3D CoTGFB-4	2.18253	0.129588
3D CoTGFB-5	30.74	20.44	28.44		3D CoTGFB-5	-10.3	-2.3		3D CoTGFB-2	-3.56267	2.21133		3D CoTGFB-5	2.33378	0.265847
									3D CoTGFB-3	-3.40767	2.39133
									3D CoTGFB-4	-1.126	2.948
									3D CoTGFB-5	-1.22267	1.91133
CT	mGAPDH	mMYOG		ΔCT	mMYOG		Av. ΔCT	mMYOG		Fold Change	mMYOG		Av. Fold Change	mMYOG
2D MyoCon-1	18.7767	20.9067		2D MyoCon-1	2.13		2D MyoCon	2.074		2D MyoCon-1	0.961927		2D MyoCon	1.00973
2D MyoCon-2	18.5433	20.4733		2D MyoCon-2	1.93					2D MyoCon-2	1.10496		2D MyoTGFB	0.0689134
2D MyoCon-3	19.4333	21.2		2D MyoCon-3	1.76667		ΔΔCT	mMYOG		2D MyoCon-3	1.23742		2D CoCon	0.0963228
2D MyoCon-4	19.2767	21.5167		2D MyoCon-4	2.24		2D MyoCon-1	0.056		2D MyoCon-4	0.89131		2D CoTGFB	0.00271136
2D MyoCon-5	19.2633	21.5667		2D MyoCon-5	2.30333		2D MyoCon-2	-0.144		2D MyoCon-5	0.853029		3D MyoCon	0.177045
2D MyoTGFB-1	19.84	27.92		2D MyoTGFB-1	8.08		2D MyoCon-3	-0.307333		2D MyoTGFB-1	0.0155602		3D MyoTGFB	1.88159
2D MyoTGFB-2	20.8267	26.77		2D MyoTGFB-2	5.94333		2D MyoCon-4	0.166		2D MyoTGFB-2	0.068425		3D CoCon	0.236529
2D MyoTGFB-3	20.3733	26.34		2D MyoTGFB-3	5.96667		2D MyoCon-5	0.229333		2D MyoTGFB-3	0.0673272		3D CoTGFB	9.68191
2D MyoTGFB-4	20.3633	25.72		2D MyoTGFB-4	5.35667		2D MyoTGFB-1	6.006		2D MyoTGFB-4	0.102759
2D MyoTGFB-5	20.75	26.29		2D MyoTGFB-5	5.54		2D MyoTGFB-2	3.86933		2D MyoTGFB-5	0.0904961		SD	mMYOG
2D CoCon-1	19.0133	23.615		2D CoCon-1	4.60167		2D MyoTGFB-3	3.89267		2D CoCon-1	0.173419		2D MyoCon	0.159511
2D CoCon-2	21.5733	26.54		2D CoCon-2	4.96667		2D MyoTGFB-4	3.28267		2D CoCon-2	0.134654		2D MyoTGFB	0.033394
2D CoCon-3	20.3033	26.125		2D CoCon-3	5.82167		2D MyoTGFB-5	3.466		2D CoCon-3	0.0744458		2D CoCon	0.0585965
2D CoCon-4	20.34	27.89		2D CoCon-4	7.55		2D CoCon-1	2.52767		2D CoCon-4	0.0224678		2D CoTGFB	0.00164156
2D CoCon-5	21.65	27.43		2D CoCon-5	5.78		2D CoCon-2	2.89267		2D CoCon-5	0.0766272		3D MyoCon	0.0761655
2D CoTGFB-1	20.83	32.5433		2D CoTGFB-1	11.7133		2D CoCon-3	3.74767		2D CoTGFB-1	0.00125392		3D MyoTGFB	0.868026
2D CoTGFB-2	19.68	30.0067		2D CoTGFB-2	10.3267		2D CoCon-4	5.476		2D CoTGFB-2	0.00327869		3D CoCon	0.124424
2D CoTGFB-3	18.6167	29.1967		2D CoTGFB-3	10.58		2D CoCon-5	3.706		2D CoTGFB-3	0.00275067		3D CoTGFB	4.55642
2D CoTGFB-4	18.74	30.59		2D CoTGFB-4	11.85		2D CoTGFB-1	9.63933		2D CoTGFB-4	0.00114059
2D CoTGFB-5	19.48	29.16		2D CoTGFB-5	9.68		2D CoTGFB-2	8.25267		2D CoTGFB-5	0.00513294		SE	mMYOG
3D MyoCon-1	19.04	23.77		3D MyoCon-1	4.73		2D CoTGFB-3	8.506		3D MyoCon-1	0.158659		2D MyoCon	0.0713355
3D MyoCon-2	25.05	28.99		3D MyoCon-2	3.94		2D CoTGFB-4	9.776		3D MyoCon-2	0.274333		2D MyoTGFB	0.0149343
3D MyoCon-3	25.37	29.52		3D MyoCon-3	4.15		2D CoTGFB-5	7.606		3D MyoCon-3	0.237171		2D CoCon	0.0262052
3D MyoCon-4	24.32	29.72		3D MyoCon-4	5.4		3D MyoCon-1	2.656		3D MyoCon-4	0.0997182		2D CoTGFB	0.000734127
3D MyoCon-5	20.64	25.83		3D MyoCon-5	5.19		3D MyoCon-2	1.866		3D MyoCon-5	0.115343		3D MyoCon	0.0340623
3D MyoTGFB-1	22.27	24.72		3D MyoTGFB-1	2.45		3D MyoCon-3	2.076		3D MyoTGFB-1	0.770571		3D MyoTGFB	0.388193
3D MyoTGFB-2	22.92	24.5		3D MyoTGFB-2	1.58		3D MyoCon-4	3.326		3D MyoTGFB-2	1.40834		3D CoCon	0.0556443
3D MyoTGFB-3	23.59	24.83		3D MyoTGFB-3	1.24		3D MyoCon-5	3.116		3D MyoTGFB-3	1.78262		3D CoTGFB	2.03769
3D MyoTGFB-4	24.67	25.44		3D MyoTGFB-4	0.77		3D MyoTGFB-1	0.376		3D MyoTGFB-4	2.46913
3D MyoTGFB-5	23.71	24.21		3D MyoTGFB-5	0.5		3D MyoTGFB-2	-0.494		3D MyoTGFB-5	2.97729
3D CoCon-1	19.3167	24.11		3D CoCon-1	4.79333		3D MyoTGFB-3	-0.834		3D CoCon-1	0.151845
3D CoCon-2	18.85	23.6933		3D CoCon-2	4.84333		3D MyoTGFB-4	-1.304		3D CoCon-2	0.146672
3D CoCon-3	19.73	24.62		3D CoCon-3	4.89		3D MyoTGFB-5	-1.574		3D CoCon-3	0.142004
3D CoCon-4	19.7	23.1		3D CoCon-4	3.4		3D CoCon-1	2.71933		3D CoCon-4	0.398873
3D CoCon-5	20.1833	23.8		3D CoCon-5	3.61667		3D CoCon-2	2.76933		3D CoCon-5	0.34325
3D CoTGFB-1	26.0733	25.87		3D CoTGFB-1	-0.203333		3D CoCon-3	2.816		3D CoTGFB-1	4.84781
3D CoTGFB-2	29.5433	27.52		3D CoTGFB-2	-2.02333		3D CoCon-4	1.326		3D CoTGFB-2	17.1167
3D CoTGFB-3	30.3133	29.285		3D CoTGFB-3	-1.02833		3D CoCon-5	1.54267		3D CoTGFB-3	8.58807
3D CoTGFB-4	22.07	21.16		3D CoTGFB-4	-0.91		3D CoTGFB-1	-2.27733		3D CoTGFB-4	7.91177
3D CoTGFB-5	21	19.76		3D CoTGFB-5	-1.24		3D CoTGFB-2	-4.09733		3D CoTGFB-5	9.9452
							3D CoTGFB-3	-3.10233
							3D CoTGFB-4	-2.984
							3D CoTGFB-5	-3.314
