# Supplementary material for: 3D skeletal muscle fascicle engineering is improved with TGF-β1 treatment of myogenic cells and their co-culture with myofibroblasts
Source: PeerJ. 2018 Jul 11;6:e4939. doi: 10.7717/peerj.4939 (PMC6045923; doi:10.7717/peerj.4939)
Supplement: Supplemental Information 6 — This spreadsheet notes the shortening length (mm) of 3D samples during whole tissue slack tests after 27 minutes to calculate the total % of tissue shrinkage from their original size. [file peerj-06-4939-s006.xlsx]

## Sheet: Fig 5B
Time (min)	3D FibCon-1 (mm)	3D FibCon-2	3D FibCon-3	3D FibCon-4	3D FibTGFB-1	3D FibTGFB-2	3D FibTGFB-3	3D FibTGFB-4	3D MyoCon-1	3D MyoCon-2	3D MyoCon-3	3D MyoCon-4	3D MyoTGFB-1	3D MyoTGFB-2	3D MyoTGFB-3	3D MyoTGFB-4	3D CoCon-1	3D CoCon-2	3D CoCon-3	3D CoCon-4	3D CoTGFB-1	3D CoTGFB-2	3D CoTGFB-3	3D CoTGFB-4
0	2.524	2.358	2.433	2.492	2.413	2.478	2.411	2.409	2.366	2.434	2.419	2.494	2.482	2.424	2.499	2.458	2.414	2.443	2.484	2.412	2.476	2.423	2.409	2.457
3	2.365	2.109	2.238	2.301	2.315	2.219	2.284	2.306	1.862	2.017	1.9395	1.977	2.013	1.736	1.8745	1.786	1.64	1.541	1.554	1.707	1.633	1.643	1.687	1.874
6	2.294	2.037	2.284	2.245	2.247	2.104	2.2	2.242	1.786	1.907	1.8465	1.867	1.899	1.691	1.795	1.643	1.44	1.46	1.375	1.346	1.501	1.456	1.401	1.482
9	2.255	2.007	2.198	2.176	2.207	2.015	2.164	2.178	1.754	1.821	1.7875	1.822	1.818	1.635	1.7265	1.609	1.321	1.43	1.312	1.285	1.446	1.43	1.359	1.414
12	2.238	2.007	2.145	2.176	2.182	1.942	2.045	2.122	1.725	1.762	1.7435	1.7976	1.758	1.594	1.676	1.585	1.205	1.396	1.279	1.233	1.399	1.414	1.319	1.38
15	2.238	2.007	2.145	2.176	2.176	1.942	2.045	2.122	1.719	1.725	1.722	1.753	1.702	1.558	1.63	1.564	1.1159	1.378	1.258	1.2	1.399	1.375	1.307	1.38
18	2.238	2.007	2.145	2.176	2.176	1.942	2.045	2.122	1.701	1.704	1.7025	1.739	1.692	1.558	1.625	1.564	1.1134	1.366	1.242	1.118	1.378	1.371	1.307	1.38
21	2.238	2.007	2.145	2.176	2.176	1.942	2.045	2.122	1.688	1.684	1.686	1.704	1.624	1.558	1.615	1.564	1.1134	1.349	1.217	1.1089	1.357	1.362	1.307	1.38
24	2.238	2.007	2.145	2.176	2.176	1.942	2.045	2.122	1.688	1.671	1.6795	1.699	1.502	1.52	1.579	1.564	1.1134	1.336	1.217	1.1089	1.357	1.362	1.307	1.38
27	2.238	2.007	2.145	2.176	2.176	1.942	2.045	2.122	1.688	1.671	1.6795	1.697	1.502	1.52	1.55	1.564	1.1134	1.3107	1.217	1.1089	1.335	1.362	1.307	1.38
% shrinking	88.6688	85.1145	88.1628	87.3194	90.1782	78.3697	84.8196	88.0863	71.344	68.6524	69.4295	68.0433	60.5157	62.7063	62.0248	63.629	46.1226	53.6512	48.9936	45.9743	53.9176	56.2113	54.2549	56.1661
	FibCon	FibTGFB	MyoCon	MyoTGFB	CoCon	CoTGFB
1	88.6688	90.1782	71.344	60.5157	46.1226	53.9176
2	85.1145	78.3697	68.6524	62.7063	53.6512	56.2113
3	88.1628	84.8196	69.4295	62.0248	48.9936	54.2549
4	87.3194	88.0863	68.0433	63.629	45.9743	56.1661
average % change	87.3164	85.3634	69.3673	62.2189	48.6854	55.1375
SD	1.56988	5.15768	1.43473	1.31204	3.59038	1.22177
SE	0.784942	2.57884	0.717367	0.656019	1.79519	0.610884
