# Supplementary material for: 3D skeletal muscle fascicle engineering is improved with TGF-β1 treatment of myogenic cells and their co-culture with myofibroblasts
Source: PeerJ. 2018 Jul 11;6:e4939. doi: 10.7717/peerj.4939 (PMC6045923; doi:10.7717/peerj.4939)
Supplement: Supplemental Information 7 — This spreadsheet notes the shortening length (mm) of 3D samples during cleaved tissue slack tests over time (min) and the calculation of total % of tissue shrinkage from their original size after 24 h. [file peerj-06-4939-s007.xlsx]

## Sheet: Fig 5C
Sample	Original length (um)	T = 0min	3	6	9	12	15	24 hours
3D MyoCon-1	6280	5.168	4.8	4.593	4.441	4.3	4.2925	3.21784
3D MyoCon-2	6280	5.326	4.835	4.588	4.476	4.388	4.2415	3.32526
3D MyoCon-3	6280	5.767	4.691	4.5875	4.437	4.29	4.2835	3.49431
3D MyoCon-4	6280	4.8725	4.768	4.2865	4.2825	4.1355	4.083	3.33225
3D MyoTGFB-1	6280	5.0845			4.1555	4.0905	4.066	3.0639
3D MyoTGFB-2	6280	5.316	4.371	4.0285	3.853	3.8265	3.783	3.11658
3D MyoTGFB-3	6280	4.933	4.321	3.9995	3.9455	3.8515	3.8295	3.24198
3D MyoTGFB-4	6280	5.462	4.2185	3.9735	3.8545	3.676	3.614	3.07545
3D CoCon-1	6280	4.344	3.8965	3.5935	3.5385	3.1985	3.169	2.999
3D CoCon-2	6280	3.773	3.414	3.1645	3.0315	2.971	2.9665	2.84684
3D CoCon-3	6280	4.385	3.8605	3.617	3.5115	3.424	3.297	2.8721
3D CoCon-4	6280	3.895	3.4865	3.2345	3.182	2.915	2.8455	2.8125
3D CoTGFB-1	6280	4.5655	3.889	3.7275	3.604	3.5625	3.513	2.73231
3D CoTGFB-2	6280	4.458	4.115	4.0175	3.8325	3.668	3.634	2.83801
3D CoTGFB-3	6280	4.79	4.033	3.7325	3.552	3.5015	3.352	2.7032
3D CoTGFB-4	6280	4.7755	4.3465	4.076	4.014	3.924	3.814	2.68374
3D CoTGFB-5	6280	4.4365		3.592	3.49		3.3165	2.44607
		av. T = 0	av. T = 3	av. T = 6	av. T = 9	av. T = 12	av. T = 15	av. 24 hours
3D MyoCon		5.28337	4.7735	4.51375	4.40912	4.27837	4.22513	3.34241
3D MyoTGFB		5.19888	4.3035	4.0005	3.95213	3.86112	3.82313	3.12448
3D CoCon		4.09925	3.66437	3.40238	3.31588	3.12713	3.0695	2.88261
3D CoTGFB		4.6051	4.09587	3.8291	3.6985	3.664	3.5259	2.68067

## Sheet: Fig 5E
Sample	Original length (um)	Final length (um)	% shrinking
3D MyoCon-1	6280	3217.84	51.2394
3D MyoCon-2	6280	3325.26	52.9499
3D MyoCon-3	6280	3494.31	55.6419
3D MyoCon-4	6280	3332.25	53.0613
3D MyoTGFB-1	6280	3063.9	48.7882
3D MyoTGFB-2	6280	3116.58	49.6271
3D MyoTGFB-3	6280	3241.97	51.6238
3D MyoTGFB-4	6280	3075.45	48.9722
3D CoCon-1	6280	2999.81	47.7677
3D CoCon-2	6280	2846.84	45.3318
3D CoCon-3	6280	2872.1	45.7341
3D CoCon-4	6280	3139.61	49.9938
3D CoTGFB-1	6280	2732.31	43.5081
3D CoTGFB-2	6280	2838.01	45.1912
3D CoTGFB-3	6280	2703.2	43.0446
3D CoTGFB-4	6280	2683.74	42.7346
3D CoTGFB-5	6280	2446.07	38.9502
	3D MyoCon	3D MyoTGFB	3D CoCon	3D CoTGFB
average % change	53.2231	49.7528	47.2069	42.6858
SD	1.81533	1.29824	2.14216	2.29341
SE	0.907665	0.649121	1.07108	1.02564
