# Supplementary material for: 3D skeletal muscle fascicle engineering is improved with TGF-β1 treatment of myogenic cells and their co-culture with myofibroblasts
Source: PeerJ. 2018 Jul 11;6:e4939. doi: 10.7717/peerj.4939 (PMC6045923; doi:10.7717/peerj.4939)
Supplement: Supplemental Information 8 — This spreadsheet contains the recorded thickness (um) of tissue samples. [file peerj-06-4939-s008.xlsx]

## Sheet: Fig 5F
Thickness (um)	3D FibCon	3D FibTGFB	3D MyoCon	3D MyoTGFB	3D CoCon	3D CoTGFB
1	297.8	472.4	180.5	237.4	305.9	234.9
2	347	369.6	196.3	241.5	237.4	281.8
3	265.3	420	263.7	198.5	233.1	280.4
4	311.1	488.1	175.1	273.6	242.9	241.6
5	265.4	429.9	222.1	224.9	233.3	398.7
6	259.7	438.3	301.2	213.7	288.9	219.4
7	261.1	401.3	254	266.153	230.7	304.8
8	210.4	492.4	161	234.5	267.678	434
9	471	418.4	233.2	269.7	236.2	466.7
10	256.1	363.1	236	284.5	304.6	484.9
11	225.1	337.2	247.4	262.3	177.9	401.4
12	197.8	374.3	291.5	271		425.7
13	254.2
	3D FibCon	3D FibTGFB	3D MyoCon	3D MyoTGFB	3D CoCon	3D CoTGFB
average thickness	278.615	417.083	230.167	248.146	250.78	347.858
SD	70.2849	50.4798	45.061	26.9991	38.0263	96.8388
SE	19.4935	14.5723	13.008	7.79397	11.4654	27.955
