# Supplementary material for: 3D skeletal muscle fascicle engineering is improved with TGF-β1 treatment of myogenic cells and their co-culture with myofibroblasts
Source: PeerJ. 2018 Jul 11;6:e4939. doi: 10.7717/peerj.4939 (PMC6045923; doi:10.7717/peerj.4939)
Supplement: Supplemental Information 10 — This spreadsheet contains Young’s modulus values for engineered tissues via AFM testing. [file peerj-06-4939-s010.xlsx]

## Sheet: Fig 5I
Young's Modulus (Pa)	3D MyoCon	3D CoCon	3D CoTGFB
	2518.95	2249.79	3525.7
	3270.58	3900.32	2384.37
	3331.52	4179.64	5164.25
	1706.39	2813.51	4667.04
	1421.99	6459.9	6689.8
	2234.56	4723.04	8622.16
	4936.34	2346.28	3842.11
	3483.88	4174.56	5458.06
	3169.01	3529.58	11684.5
	3788.59	2772.88	8548.7
	1554.03	2833.82	12023.6
	1543.88	3235.03	7927.18
	1787.65	1178.22	6068.28
	1239.16	2864.29	5717.97
	2854.14	1300.11	7102.26
	1645.45	3108.06	8243.59
	1985.71	4875.4	8102.34
	1655.6	5241.05	10515
	2742.41	5078.54	8870.76
	3534.66	2051.73	7220.91
	6119.64	3270.58	2508.67
	1614.97	1249.32	2898.54
	1716.55	3199.48	9300.18
	2107.59	2087.28	9390.58
	4342.15	4255.81	9447.08
	1376.28	3026.81	3650.01
	1518.48	4438.64	10701.4
	2016.18	2153.3	4011.62
	2295.5	4783.98	6441.19
	2138.06	4966.81	3706.51
	2498.64	1747.02	6667.2
	2112.67	2082.2	4915.65
	4144.09	2859.22	7672.93
	2498.64	1868.9	4215.02
	4265.97	5190.26	5226.4
	4001.89	5312.15	6848
	1355.97	3570.21	4836.54
	5484.82	3717.49	3028.49
	4174.56	5220.74	1028.33
	2315.81	5687.96	644.119
	3433.09	4580.84	4830.89
	1523.56	2899.84	4486.23
	1594.66	3042.04	4508.83
	1929.84	2473.25	3344.9
	4032.36	5769.22	4226.33
	1137.59	6200.89
		6348.17
	3D MyoCon	3D CoCon	3D CoTGFB
Average	2655.52	3636.56	6020.32
SD	1220.67	1437.88	2760.64
SE	181.967	212.004	416.182
