# Supplementary material for: 3D skeletal muscle fascicle engineering is improved with TGF-β1 treatment of myogenic cells and their co-culture with myofibroblasts
Source: PeerJ journal article supplement (doi:10.7717/peerj.4939), 2018-07-11

$\alpha$ -SMA

Merged

FibCon

A

B

C

D

FibTGF $\beta$

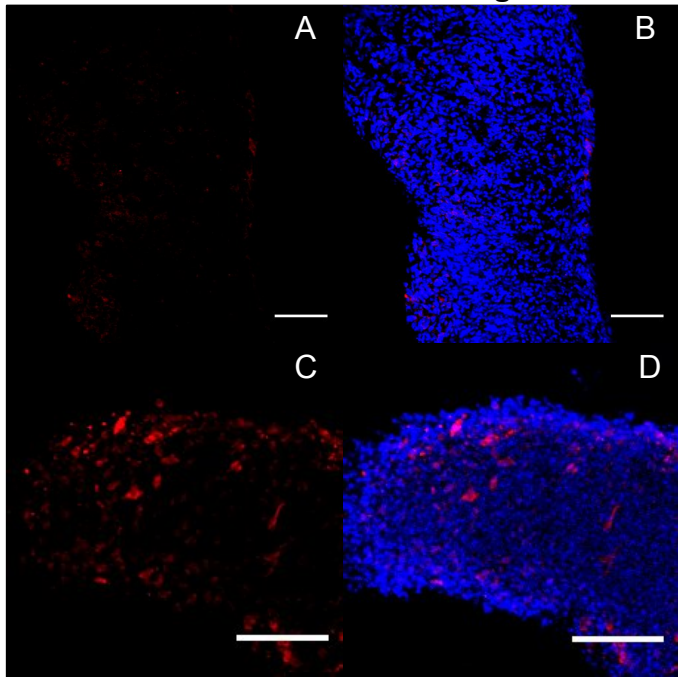

Supplement: Supplemental_figure_S1.pdf [file Supplemental_figure_S1.pdf]
